# Supplementary material for: A randomised controlled pilot trial of oral 11β-HSD1 inhibitor AZD4017 for wound healing in adults with type 2 diabetes mellitus
Source: bioRxiv or medRxiv preprint supplement (doi:10.1101/2021.03.23.21254200), 2021-03-26

Figure S1

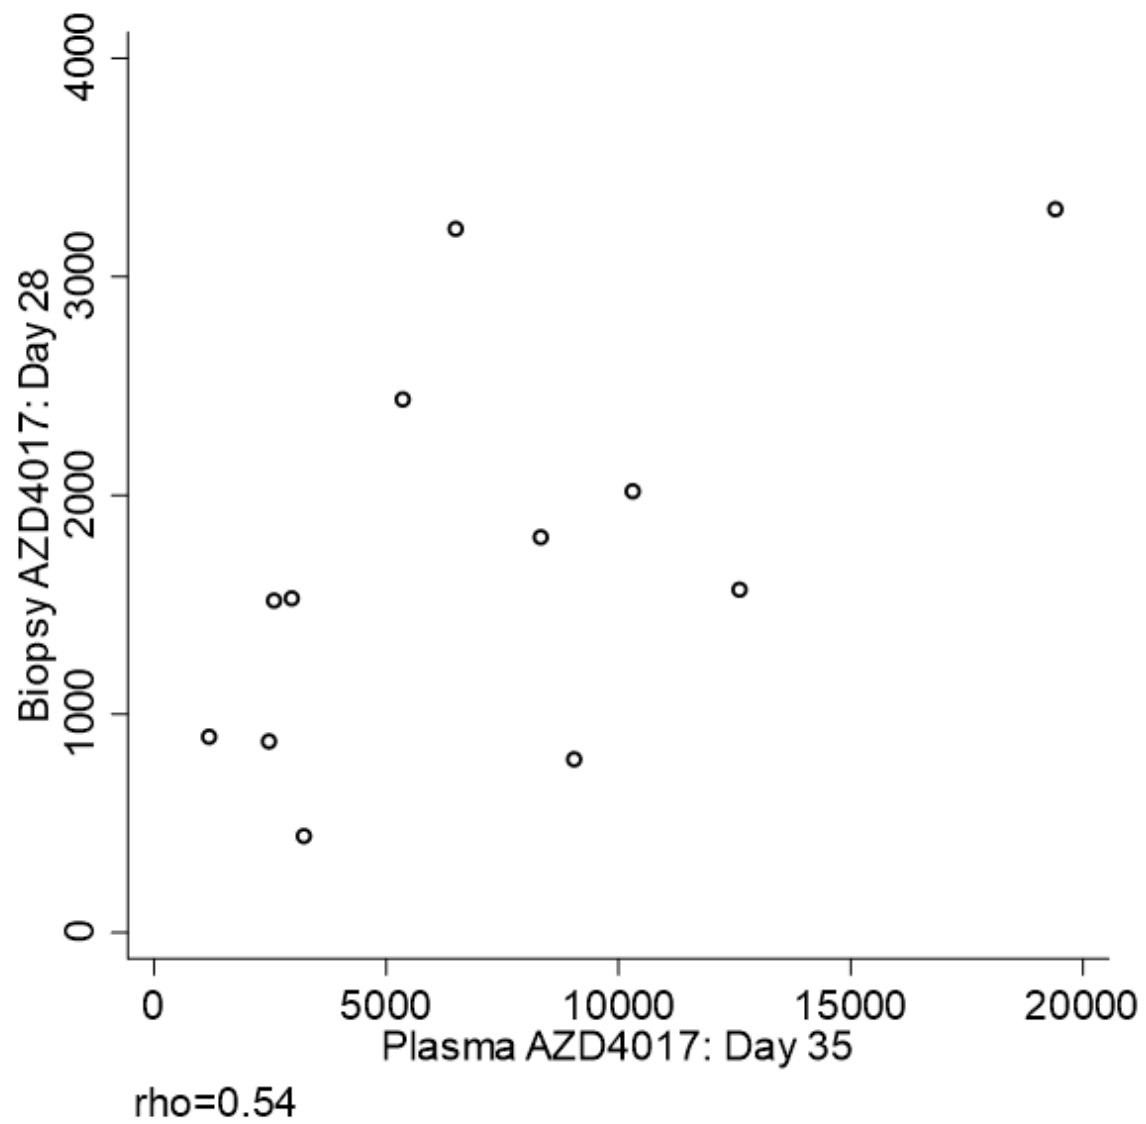

Supplement: Supplementary file [file media-17.pdf]
